# Supplementary material
Source: MDPI journal article supplement (https://www.mdpi.com/2304-6740/11/12/482)
Supplement: s1 [file s1]

# Supporting Information

## Modulation of Ferrocene–Ferrocene Interactions by Varying Their Reciprocal Positions in *L*-Dap/Aib Helical Peptides

Annalisa Bisello <sup>1</sup>, Barbara Biondi <sup>2</sup>, Roberta Cardena <sup>1</sup>, Renato Schiesari <sup>1</sup>, Marco Crisma <sup>2</sup>, Fernando Formaggio <sup>1</sup> and Saverio Santi <sup>1,\*</sup>

<sup>1</sup> Department of Chemical Sciences, University of Padova, via Marzolo 1, 35131 Padova, Italy; roberta.cardena@unipd.it (R.C.); fernando.formaggio@unipd.it (F.F.)

<sup>2</sup> Institute of Biomolecular Chemistry, Padova Unit, Consiglio Nazionale delle Ricerche (CNR), via Marzolo 1, 35131 Padova, Italy; marco.crisma@unipd.it (M.C.)

\* Correspondence: saverio.santi@unipd.it

### Synthesis and characterization of *Z*-*L*-Dap(Boc)-Aib-NH*i*Pr

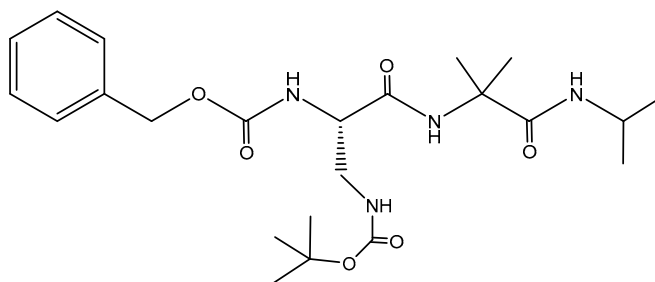

*Z*-*L*-Dap(Boc)-OH (2.40 g, 7.09 mmol) was dissolved in anhydrous CH<sub>2</sub>Cl<sub>2</sub>. Then, HOBT (1.30 g, 8.51 mmol), EDC·HCl (1.55 g, 1.63 mmol), and H-Aib-NH*i*Pr, obtained by catalytic hydrogenolysis of *Z*-Aib-NH*i*Pr (1.99 g, 7.15 mmol) and DIEA (1.85 mL, 10.64 mmol) were added to the solution. After stirring the solution at room temperature for 24 h, CH<sub>2</sub>Cl<sub>2</sub> was evaporated under reduced pressure. The oily residue was dissolved in ethyl acetate (EtOAc) and washed with 5% NaHCO<sub>3</sub>, 5% KHSO<sub>4</sub>, 5% NaHCO<sub>3</sub> and saturated NaCl solution. The organic solution was dried on anhydrous Na<sub>2</sub>SO<sub>4</sub> and after filtration the solvent was removed under vacuum to yield a white powder.

Yield, 78%;

IR (CDCl<sub>3</sub>, 1 mM) 3453, 3425, 3367, 1710, 1693, 1664, 1505 cm<sup>-1</sup>.

<sup>1</sup>H NMR (400.13 MHz, CDCl<sub>3</sub>): δ 7.35 (m, 5H, Z), 6.64 (s, 1H, NH-Aib), 6.40 (s, 1H, NH-Dap), 6.35 (s, 1H, NH-*i*Pr), 5.14 (m, 3H, NH Boc, CH<sub>2</sub> Z), 4.10 (m, 1H, CH Dap), 4.02 (m, 1H, CH *i*Pr), 3.48

(m, 2H, CH<sub>2</sub> Dap), 1.50 (s, 3H, CH<sub>3</sub>Aib), 1.44 (s, 9H, CH<sub>3</sub>Boc), 1.42 (s, 3H, CH<sub>3</sub>Aib), 1.13 (dd, 6H, NH-*i*Pr).

HRMS (ESI<sup>+</sup>): *m/z* calcd for C<sub>23</sub>H<sub>36</sub>N<sub>4</sub>O<sub>6</sub> [M]<sup>+</sup>, 464.26; found, 487 [M+Na]<sup>+</sup>.

### Synthesis and characterization of Z-Aib-L-Dap(Boc)-Aib-NH*i*Pr

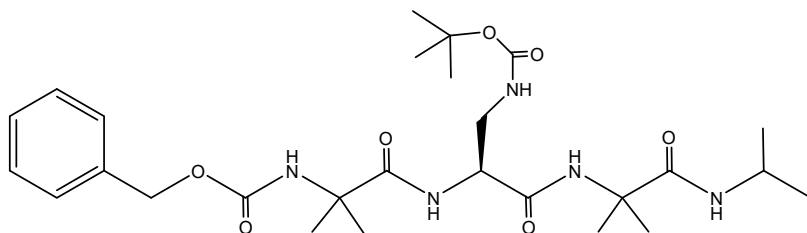

This compound was obtained from Z-Aib-OH (1.00 g, 3.59 mmol) and H-L-Dap(Boc)-Aib-NH*i*Pr, obtained by catalytic hydrogenolysis of Z- L-Dap(Boc)-Aib-NH*i*Pr (1.67 g, 3.59 mmol) as described for Z-L-Dap(Boc)-Aib-NH*i*Pr.

Yield, 89%;

IR (CDCl<sub>3</sub>, 1 mM) 3453, 3433, 3345, 1716, 1677, 1525, 1505 cm<sup>-1</sup>.

<sup>1</sup>H NMR (400.13 MHz, CDCl<sub>3</sub>): δ 8.35 (d, 1H, NH-Dap), 7.34 (m, 5H, Z), 7.31 (s, 1H, NH-Aib), 6.60 (d, 1H, NH-*i*Pr), 5.26 (s, 1H, NH-Aib), 5.18 (m, 1H, NH Boc), 5.11, 5.04 (q AB, 2H, CH<sub>2</sub> Z), 4.13 (m, 1H, CH Dap), 4.02 (m, 1H, CH *i*Pr), 3.50 (m, 2H, CH<sub>2</sub> Dap), 1.54 (s, 3H, CH<sub>3</sub>Aib), 1.51 (s, 3H, CH<sub>3</sub>Aib), 1.48 (s, 3H, CH<sub>3</sub>Aib), 1.44 (s, 9H, CH<sub>3</sub>Boc), 1.43 (s, 3H, CH<sub>3</sub>Aib), 1.15 (dd, 6H, NH-*i*Pr). HRMS (ESI<sup>+</sup>): *m/z* calcd for C<sub>27</sub>H<sub>43</sub>N<sub>5</sub>O<sub>7</sub> [M]<sup>+</sup>, 549.32; found, 572.3 [M+Na]<sup>+</sup>.

### Synthesis and characterization of Z-(Aib)<sub>2</sub>-L-Dap(Boc)-Aib-NH*i*Pr

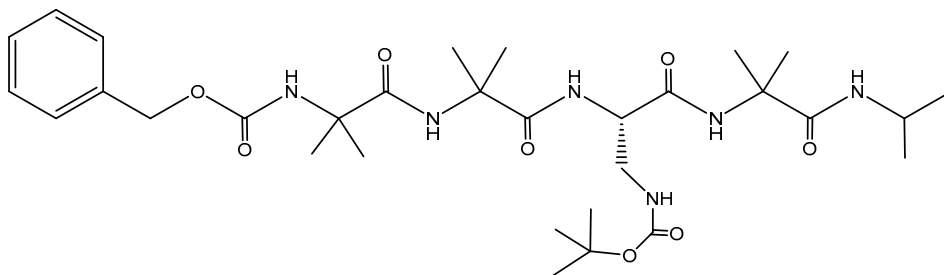

This compound was obtained from Z-Aib-OH (1.00 g, 3.59 mmol) and H-Aib-L-Dap(Boc)-Aib-NH*i*Pr, obtained by catalytic hydrogenolysis of Z-Aib-L-Dap(Boc)-Aib-NH*i*Pr (1.97 g, 3.59 mmol) as described for Z-L-Dap(Boc)-Aib-NH*i*Pr.

Yield, 75%;

IR (CDCl<sub>3</sub>, 1 mM) 3450, 3424, 3349, 1709, 1678, 1529, 1505 cm<sup>-1</sup>.

<sup>1</sup>H NMR (400.13 MHz, CDCl<sub>3</sub>): δ 7.69 (d, 1H, NH-Dap), 7.37 (m, 5H, Z), 7.23 (s, 1H, NH-Aib), 6.68 (d, 1H, NH-*i*Pr), 6.53 (s, 1H, NH-Aib), 5.42 (s, 1H, NH-Aib), 5.40 (m, 1H, NH Boc), 5.20, 5.12 (q AB, 2H, CH<sub>2</sub> Z), 4.06 (m, 1H, CH Dap), 4.03 (m, 1H, CH *i*Pr), 3.63, 3.47 (m, 2H, CH<sub>2</sub> Dap), 1.55 (s, 3H, CH<sub>3</sub>Aib), 1.51 (s, 3H, CH<sub>3</sub>Aib), 1.50 (s, 3H, CH<sub>3</sub>Aib), 1.47 (s, 3H, CH<sub>3</sub>Aib), 1.46 (s, 3H, CH<sub>3</sub>Aib), 1.40 (s, 9H, CH<sub>3</sub>Boc), 1.36 (s, 3H, CH<sub>3</sub>Aib), 1.14 (t, 6H, NH-*i*Pr).

HRMS (ESI<sup>+</sup>): *m/z* calcd for C<sub>31</sub>H<sub>50</sub>N<sub>6</sub>O<sub>8</sub> [M]<sup>+</sup>, 634.37; found, 657.4 [M+Na]<sup>+</sup>.

### Synthesis and characterization of Z-L-Dap(Boc)-(Aib)<sub>2</sub>-L-Dap(Boc)-Aib-NH*i*Pr

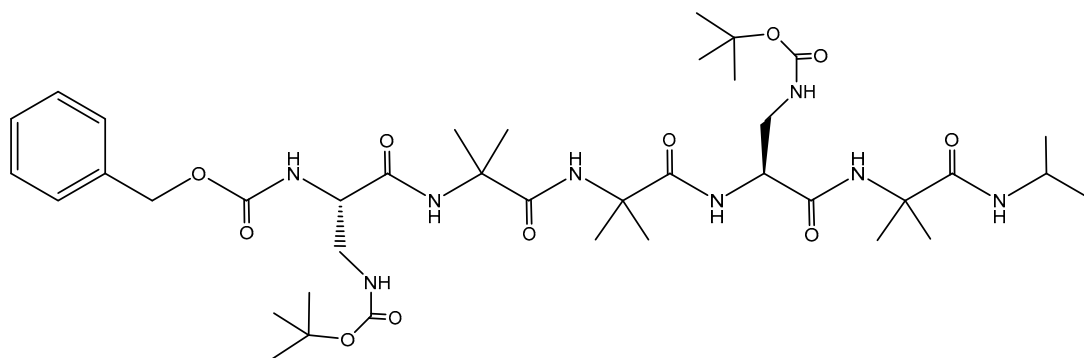

This compound was obtained from Z-L-Dap(Boc)-OH (0.85 g, 2.52 mmol) and H-(Aib)<sub>2</sub>-L-Dap(Boc)-Aib-NH*i*Pr, obtained by catalytic hydrogenolysis of Z-(Aib)<sub>2</sub>-L-Dap(Boc)-Aib-NH*i*Pr (1.60 g, 2.52 mmol) as described for Z-L-Dap(Boc)-Aib-NH*i*Pr.

Yield, 80%;

IR (CDCl<sub>3</sub>, 1 mM) 3450, 3407, 3342, 1707, 1673, 1514 cm<sup>-1</sup>.

<sup>1</sup>H NMR (400.13 MHz, CDCl<sub>3</sub>): δ 7.48 (d, 1H, NH-Dap), 7.35 (m, 5H, Z), 7.31 (s, 1H, NH-Aib), 7.19 (s, 1H, NH-Aib), 6.96 (s, 1H, NH-Dap), 6.68 (s, 1H, NH-Aib), 6.57 (d, 1H, NH-*i*Pr), 5.31 (m, 2H, NH Boc), 5.13, 5.09 (q AB, 2H, CH<sub>2</sub> Z), 4.20 (m, 2H, CH Dap), 4.03 (m, 1H, CH *i*Pr), 3.70, 3.59, 3.51 (m, 4H, CH<sub>2</sub> Dap), 1.55 (s, 3H, CH<sub>3</sub>Aib), 1.52 (s, 3H, CH<sub>3</sub>Aib), 1.51 (s, 3H, CH<sub>3</sub>Aib), 1.46 (s, 21H, CH<sub>3</sub>Boc and CH<sub>3</sub>Aib), 1.44 (s, 3H, CH<sub>3</sub>Aib), 1.29 (s, 3H, CH<sub>3</sub>Aib), 1.10 (d, 6H, NH-*i*Pr).

HRMS (ESI<sup>+</sup>): *m/z* calcd for C<sub>39</sub>H<sub>64</sub>N<sub>8</sub>O<sub>11</sub> [M]<sup>+</sup>, 820.47; found, 843.4 [M+Na]<sup>+</sup>.

### Synthesis and characterization of Z-Aib-L-Dap(Boc)-(Aib)<sub>2</sub>-L-Dap(Boc)-Aib-NH*i*Pr

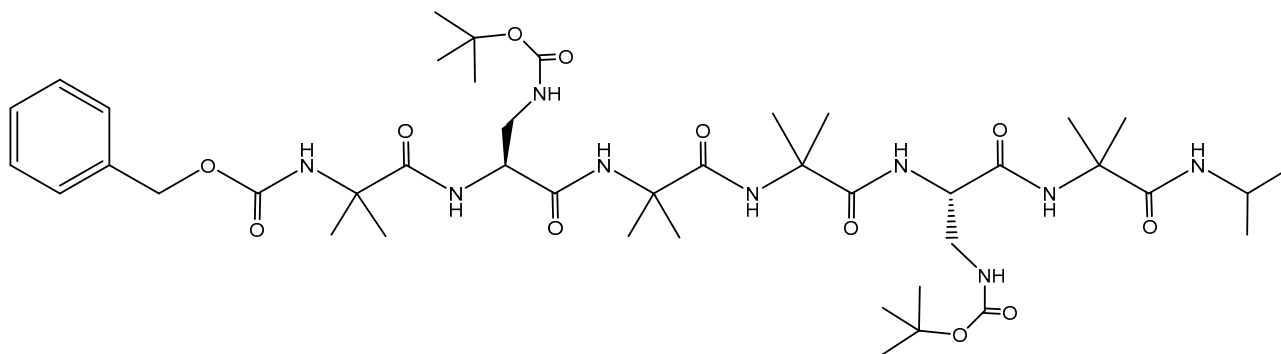

This compound was obtained from Z-Aib-OH (0.45 g, 1.88 mmol) and H-L-Dap(Boc)-(Aib)<sub>2</sub>-L-Dap(Boc)-Aib-NH*i*Pr, obtained by catalytic hydrogenolysis of Z-L-Dap(Boc)-(Aib)<sub>2</sub>-L-Dap(Boc)-Aib-NH*i*Pr (1.54 g, 1.88 mmol) as described for Z-L-Dap(Boc)-Aib-NH*i*Pr.

Yield, 65%;

IR (CDCl<sub>3</sub>, 1 mM) 3444, 3431, 3323, 1708, 1670, 1532, 1506 cm<sup>-1</sup>.

<sup>1</sup>H NMR (400.13 MHz, DMSO-*d*<sub>6</sub>): δ 8.21 (s, 1H, NH-Aib), 8.06 (s, 1H, NH-Dap), 7.98 (s, 1H, NH-Aib), 7.63 (s, 1H, NH-Aib), 7.38 (m, 7H, Z, NH-Aib), 7.07 (m, 2H, NH Boc), 6.79 (d, 1H, NH-*i*Pr),

6.72 (m, 2H, NH Boc), 5.16, 5.01 (q AB, 2H, CH<sub>2</sub> Z), 4.04 (m, 1H, CH Dap), 4.00 (m, 1H, CH Dap), 3.79 (m, 1H, CH *i*Pr), 3.48 (m, 2H, CH<sub>2</sub> Dap), 3.26 (m, 1H, CH<sub>2</sub> Dap), 3.20 (m, 1H, CH<sub>2</sub> Dap), 1.38 (s, 18H, CH<sub>3</sub>Boc), 1.36 (s, 12H, CH<sub>3</sub>Aib), 1.33 (s, 6H, CH<sub>3</sub>Aib), 1.32 (s, 6H, CH<sub>3</sub>Aib), 1.01 (d, 6H, NH-*i*Pr).

HRMS (ESI<sup>+</sup>):  $m/z$  calcd for C<sub>43</sub>H<sub>71</sub>N<sub>9</sub>O<sub>12</sub> [M]<sup>+</sup>, 905.52; found, 928.5 [M+Na]<sup>+</sup>.

### Synthesis and characterization of Z-Aib-L-Dap(Fc)-(Aib)<sub>2</sub>-L-Dap(Fc)-Aib-NH*i*Pr (1)

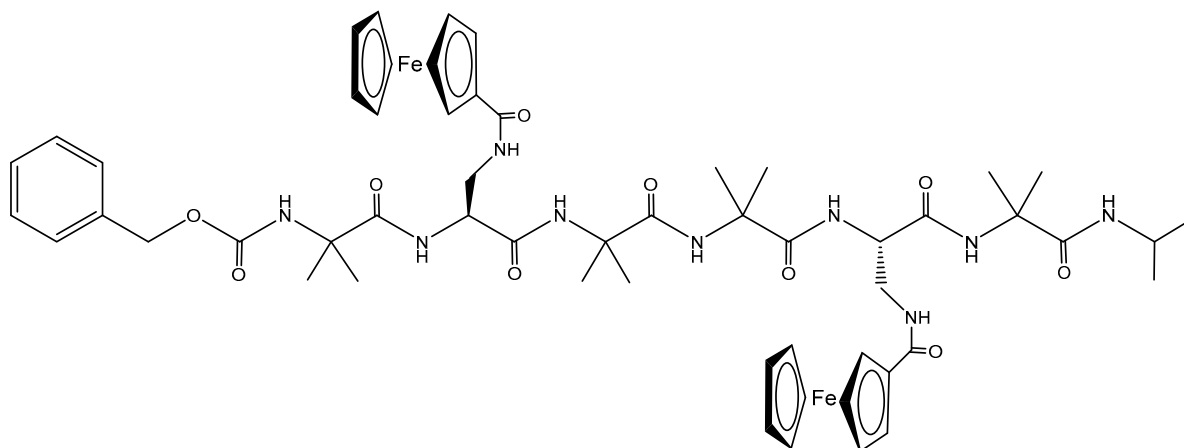

Fc-COOH (82 mg, 0.36 mmol) was dissolved in anhydrous in CH<sub>2</sub>Cl<sub>2</sub>. Then, HOBT (64 mg, 0.42 mmol), EDC·HCl (82 mg, 0.43 mmol), Z-Aib-L-Dap-(Aib)<sub>2</sub>-L-Dap-Aib-NH*i*Pr (106 mg, 0.15 mmol), obtained removing the Boc group from the side chain of the Dap unit, and DIEA (66 μL, 0.38 mmol) were added to the solution. After stirring at room temperature for 24 h, the solvent was evaporated under reduced pressure. The oily residue was dissolved in EtOAc and washed with 5% NaHCO<sub>3</sub>, 5% KHSO<sub>4</sub>, 5% NaHCO<sub>3</sub> and saturated NaCl solution. The organic solution was dried on anhydrous Na<sub>2</sub>SO<sub>4</sub> and after filtration evaporated to dryness yielding an orange powder. The crude product was purified by flash chromatography (CH<sub>2</sub>Cl<sub>2</sub>/EtOH, 10%).

Yield: 34%;

IR (CDCl<sub>3</sub>, 1 mM) 3429, 3310, 1710, 1664, 1523 cm<sup>-1</sup>.

<sup>1</sup>H NMR (600 MHz, CDCl<sub>3</sub>, 25°C, TMS): δ 8.92 (s, 1H, NH-Dap), 7.91 (s, 1H, NH-Aib), 7.83 (d, 1H, NH-Dap), 7.52 (s, 1H, NH-Aib), 7.36 (s, 1H, NH-Aib), 7.33 (m, 5H, Z), 7.19 (s, 1H, NH-Aib), 6.89 (m, 1H, NH Dap), 6.81 (m, 1H, NH Dap), 6.57 (d, 1H, NH-*i*Pr), 5.07, 4.97 (q AB, 2H, CH<sub>2</sub> Z), 4.75 (m, 1H, Fc), 4.71 (m, 2H, Fc), 4.69 (m, 1H, Fc), 4.40 (m, 1H, Fc), 4.39 (m, 1H, Fc), 4.32 (m, 3H, CH Dap, Fc), 4.20 (s, 5H, Fc), 4.19 (s, 5H, Fc), 4.18 (m, 1H, CH Dap), 4.08 (m, 1H, CH *i*Pr), 3.76 (m, 1H, CH<sub>2</sub> Dap), 3.76 (m, 1H, CH<sub>2</sub> Dap), 3.67 (m, 2H, CH<sub>2</sub> Dap), 1.63 (s, 3H, CH<sub>3</sub>Aib), 1.56 (s, 3H, CH<sub>3</sub>Aib), 1.50 (s, 3H, CH<sub>3</sub>Aib), 1.48 (s, 3H, CH<sub>3</sub>Aib), 1.44 (s, 3H, CH<sub>3</sub>Aib), 1.42 (s, 6H, CH<sub>3</sub>Aib), 1.39 (s, 3H, CH<sub>3</sub>Aib), 1.18 (m, 6H, NH-*i*Pr).

HRMS (ESI<sup>+</sup>):  $m/z$  calcd for C<sub>55</sub>H<sub>71</sub>Fe<sub>2</sub>N<sub>9</sub>O<sub>10</sub>, [M]<sup>+</sup> 1129.40; found, 1130.3 [M+H]<sup>+</sup>.

### Synthesis and characterization of Z-(Aib)<sub>2</sub>-NH*i*Pr

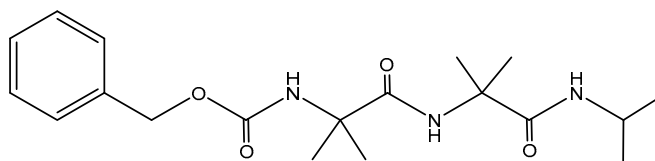

This compound was obtained from Z-Aib-OH (1.50 g, 5.39 mmol) and H-Aib-NH*i*Pr, obtained by catalytic hydrogenolysis of Z-Aib-NH*i*Pr (1.28 g, 5.39 mmol) as described for Z-L-Dap(Boc)-Aib-NH*i*Pr.

Yield, 66%;

IR (CDCl<sub>3</sub>, 1 mM) 3430, 3373, 1720, 1687, 1658, 1499 cm<sup>-1</sup>.

<sup>1</sup>H NMR (400.13 MHz, CDCl<sub>3</sub>): δ 7.35 (m, 5H, Z), 6.81 (s, 1H, NH-*i*Pr), 6.28 (s, 1H, NH-Aib), 5.19 (s, 1H, NH-Aib), 5.12 (m, 2H, CH<sub>2</sub> Z), 4.02 (m, 1H, CH *i*Pr), 1.47 (s, 6H, CH<sub>3</sub>Aib), 1.41 (s, 6H, CH<sub>3</sub>Aib), 1.14 (d, 6H, NH-*i*Pr).

HRMS (ESI<sup>+</sup>): *m/z* calcd for C<sub>19</sub>H<sub>29</sub>N<sub>3</sub>O<sub>4</sub> [M]<sup>+</sup>, 363.22; found, 386.40 [M+Na]<sup>+</sup>.

### Synthesis and characterization of Z-L-Dap(Boc)-(Aib)<sub>2</sub>-NH*i*Pr

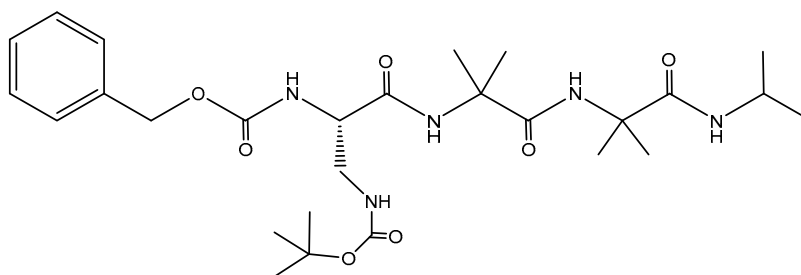

This compound was obtained from Z-L-Dap(Boc)-OH (1.30 g, 3.85 mmol) and H-(Aib)<sub>2</sub>-NH*i*Pr, obtained by catalytic hydrogenolysis of Z-(Aib)<sub>2</sub>-NH*i*Pr (1.40 g, 3.85 mmol) as described for Z-L-Dap(Boc)-Aib-NH*i*Pr.

Yield, 70%;

IR (CDCl<sub>3</sub>, 1 mM) 3453, 3419, 3367, 1705, 1689, 1506 cm<sup>-1</sup>.

<sup>1</sup>H NMR (400.13 MHz, CDCl<sub>3</sub>): δ 7.34 (m, 6H, Z, NH-Aib), 6.84 (s, 1H, NH-*i*Pr), 6.79 (s, 1H, NH-Aib), 6.65 (s, 1H, NH-Aib), 5.48 (m, 1H, NH Boc), 5.10 (m, 2H, CH<sub>2</sub> Z), 4.04 (m, 1H, CH Dap), 4.00 (m, 1H, CH *i*Pr), 3.48 (m, 2H, CH<sub>2</sub> Dap), 1.46 (s, 6H, CH<sub>3</sub>Aib), 1.44 (s, 12H, CH<sub>3</sub>Boc, CH<sub>3</sub>Aib), 1.34 (s, 3H, CH<sub>3</sub>Aib), 1.13 (d, 6H, NH-*i*Pr).

HRMS (ESI<sup>+</sup>): *m/z* calcd for C<sub>27</sub>H<sub>43</sub>N<sub>5</sub>O<sub>7</sub> [M]<sup>+</sup>, 549.32; found, 572.3 [M+Na]<sup>+</sup>.

### Synthesis and characterization of Z-Aib-L-Dap(Boc)-(Aib)<sub>2</sub>-NH*i*Pr

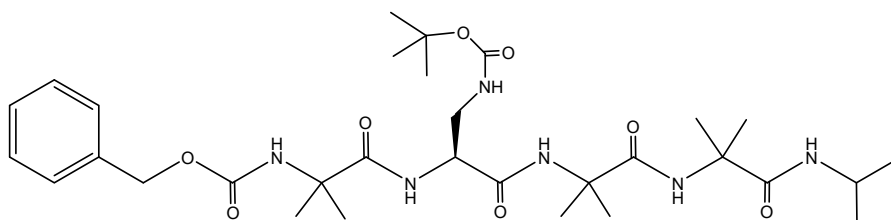

This compound was obtained from Z-Aib-OH (0.36 g, 1.51 mmol) and H-L-Dap(Boc)-(Aib)<sub>2</sub>-NH*i*Pr, obtained by catalytic hydrogenolysis of Z-L-Dap(Boc)-(Aib)<sub>2</sub>-NH*i*Pr (0.83 g, 1.51 mmol) as described for Z-L-Dap(Boc)-Aib-NH*i*Pr.

Yield, 85%;

IR (CDCl<sub>3</sub>, 1 mM) 3453, 3433, 3341, 1714, 1676, 1528, 1505 cm<sup>-1</sup>.

<sup>1</sup>H NMR (400.13 MHz, CDCl<sub>3</sub>): δ 8.45 (d, 1H, NH-Dap), 7.59 (s, 1H, NH-Aib), 7.35 (m, 5H, Z), 6.93 (d, 1H, NH-*i*Pr), 6.89 (s, 1H, NH-Aib), 5.57 (s, 1H, NH-Aib), 5.40 (m, 1H, NH Boc), 5.11, 5.07 (q AB, 2H, CH<sub>2</sub> Z), 4.05 (m, 1H, CH Dap), 4.01 (m, 1H, CH *i*Pr), 3.50 (m, 2H, CH<sub>2</sub> Dap), 1.52 (s, 3H, CH<sub>3</sub>Aib), 1.50 (s, 3H, CH<sub>3</sub>Aib), 1.46 (s, 3H, CH<sub>3</sub>Aib), 1.45 (s, 3H, CH<sub>3</sub>Aib), 1.44 (s, 9H, CH<sub>3</sub>Boc), 1.40 (s, 6H, CH<sub>3</sub>Aib), 1.14 (dd, 6H, NH-*i*Pr).

HRMS (ESI<sup>+</sup>): *m/z* calcd for C<sub>31</sub>H<sub>50</sub>N<sub>6</sub>O<sub>8</sub> [M]<sup>+</sup>, 634.37; found, 657.3 [M+Na]<sup>+</sup>.

### Synthesis and characterization of Z-L-Dap(Boc)-Aib-L-Dap(Boc)-(Aib)<sub>2</sub>-NH*i*Pr

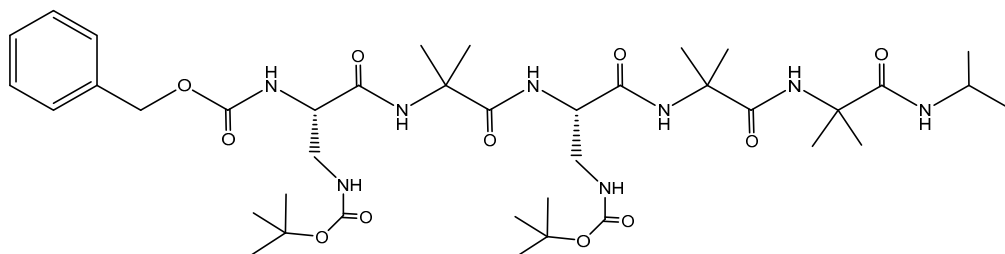

This compound was obtained from Z-L-Dap(Boc)-OH (0.47 g, 1.39 mmol) and H-Aib-L-Dap(Boc)-(Aib)<sub>2</sub>-NH*i*Pr, obtained by catalytic hydrogenolysis of Z-Aib-L-Dap(Boc)-(Aib)<sub>2</sub>-NH*i*Pr (0.88 g, 1.39 mmol) as described for Z-L-Dap(Boc)-Aib-NH*i*Pr.

Yield, 90%;

IR (CDCl<sub>3</sub>, 1 mM) 3454, 3416, 3346, 1687, 1676, 1525, 1509 cm<sup>-1</sup>.

<sup>1</sup>H NMR (400.13 MHz, CDCl<sub>3</sub>): δ 7.99 (s, 1H, NH-Dap), 7.50 (s, 1H, NH-Aib), 7.36 (m, 5H, Z), 7.12 (s, 1H, NH-Aib), 6.96 (d, 1H, NH-*i*Pr), 6.91 (s, 1H, NH-Aib), 6.58 (s, 1H, NH-Dap), 5.46 (m, 1H, NH Boc), 5.34 (m, 1H, NH Boc), 5.14 (m, 2H, CH<sub>2</sub> Z), 4.15 (m, 1H, CH Dap), 4.03 (m, 1H, CH Dap), 4.00 (m, 1H, CH *i*Pr), 3.50 (m, 4H, CH<sub>2</sub> Dap), 1.49 (s, 6H, CH<sub>3</sub>Aib), 1.47 (s, 6H, CH<sub>3</sub>Aib), 1.45 (s, 9H, CH<sub>3</sub>Boc), 1.43 (s, 9H, CH<sub>3</sub>Boc), 1.41 (s, 6H, CH<sub>3</sub>Aib), 1.15 (m, 6H, NH-*i*Pr).

HRMS (ESI<sup>+</sup>): *m/z* calcd for C<sub>39</sub>H<sub>64</sub>N<sub>8</sub>O<sub>11</sub> [M]<sup>+</sup>, 820.47; found, 843.5 [M+Na]<sup>+</sup>.

### Synthesis and characterization of Z-Aib-L-Dap(Boc)-Aib-L-Dap(Boc)-(Aib)<sub>2</sub>-NH*i*Pr

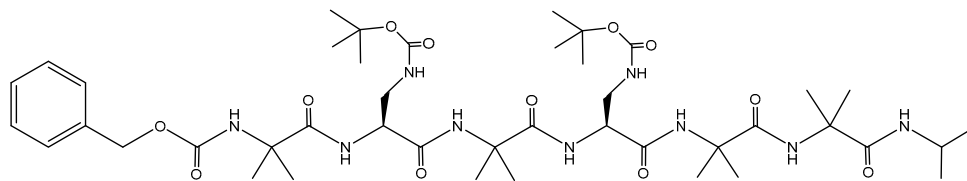

This compound was obtained from Z-Aib-OH (0.27 g, 1.88 mmol) and H-L-Dap(Boc)-Aib-L-Dap(Boc)-(Aib)<sub>2</sub>-NH*i*Pr, obtained by catalytic hydrogenolysis of Z-L-Dap(Boc)-Aib-L-Dap(Boc)-(Aib)<sub>2</sub>-NH*i*Pr (0.95 g, 1.15 mmol) as described for Z-L-Dap(Boc)-Aib-NH*i*Pr.

Yield, 70%;

IR (CDCl<sub>3</sub>, 1 Mm) 3452, 3429, 3333, 1711, 1667, 1532, 1506 cm<sup>-1</sup>.

<sup>1</sup>H NMR (400.13 MHz, DMSO-*d*<sub>6</sub>): δ 8.01 (d, 1H, NH-Dap), 7.98 (s, 1H, NH-Aib), 7.94 (s, 1H, NH-Aib), 7.84 (d, 1H, NH-Dap), 7.75 (s, 1H, NH-Aib), 7.37 (m, 5H, Z), 7.13 (s, 1H, NH-Aib), 6.98 (d, 1H, NH-*i*Pr), 6.94 (t, 1H, NH Boc), 6.69 (t, 1H, NH Boc), 5.12, 4.98 (q AB, 2H, CH<sub>2</sub> Z), 4.09 (m, 2H, 2 CH Dap), 3.76 (m, 1H, CH *i*Pr), 3.42 (m, 1H, CH<sub>2</sub> Dap), 3.39 (m, 1H, CH<sub>2</sub> Dap), 3.32 (m, 1H, CH<sub>2</sub> Dap), 3.30 (m, 1H, CH<sub>2</sub> Dap), 1.33 (m, 42H, CH<sub>3</sub>Aib, CH<sub>3</sub>Boc), 1.03 (m, 6H, NH-*i*Pr).

HRMS (ESI<sup>+</sup>): *m/z* calcd for C<sub>43</sub>H<sub>71</sub>N<sub>9</sub>O<sub>12</sub> [M]<sup>+</sup>, 905.52; found, 928.5 [M+Na]<sup>+</sup>.

### Synthesis and characterization of Z-Aib-L-Dap(Fc)-Aib-L-Dap(Fc)-(Aib)<sub>2</sub>-NH*i*Pr (2)

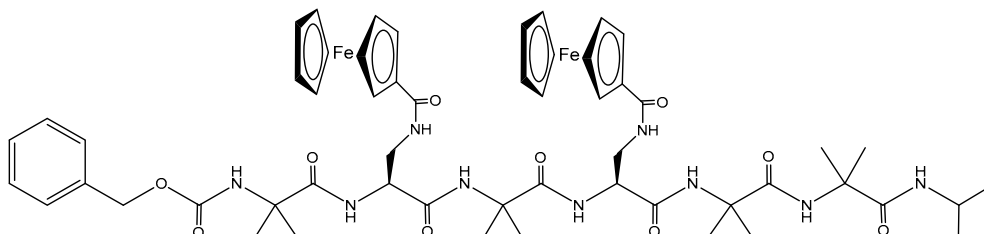

This compound was obtained from Fc-COOH (58 mg, 0.25 mmol) and Z-Aib-L-Dap-Aib-L-Dap-(Aib)<sub>2</sub>-NH*i*Pr (78 mg, 0.11 mmol), obtained removing the Boc group from the side chain of the Dap unit, as described for Z-Aib-L-Dap(Fc)-(Aib)<sub>2</sub>-L-Dap(Fc)-Aib-NH*i*Pr. The crude product was purified by flash chromatography (CH<sub>2</sub>Cl<sub>2</sub>/EtOH, 10%).

Yield: 35%;

IR (CDCl<sub>3</sub>, 1 mM) 3429, 3318, 1708, 1666, 1523 cm<sup>-1</sup>.

<sup>1</sup>H NMR (600 MHz, CDCl<sub>3</sub>, 25°C, TMS): δ 9.00 (s, 1H, NH-Dap), 7.88 (s, 1H, NH-Dap), 7.81 (s, 1H, NH-Aib), 7.50 (s, 1H, NH-Aib), 7.33 (m, 5H, Z), 6.99 (m, 3H, NH Dap, NH-*i*Pr), 5.04 (m, 2H, CH<sub>2</sub> Z), 4.78 (s, 1H, Fc), 4.76 (s, 1H, Fc), 4.72 (s, 1H, Fc), 4.63 (s, 1H, Fc), 4.41 (s, 1H, Fc), 4.38 (s, 1H, Fc), 4.34 (s, 1H, Fc), 4.32 (s, 1H, Fc), 4.20 (s, 6H, CH Dap, Fc), 4.17 (s, 5H, Fc), 4.14 (m, 1H, CH Dap), 4.07 (m, 1H, CH *i*Pr), 3.81 (m, 1H, CH<sub>2</sub> Dap), 3.69 (m, 2H, CH<sub>2</sub> Dap), 3.57 (m, 1H, CH<sub>2</sub> Dap), 1.54 - 1.47 (m, 24H, CH<sub>3</sub>Aib), 1.23 (m, 6H, NH-*i*Pr).

HRMS (ESI<sup>+</sup>): *m/z* calcd for C<sub>55</sub>H<sub>71</sub>Fe<sub>2</sub>N<sub>9</sub>O<sub>10</sub>, [M]<sup>+</sup> 1129.40; found, 1129.3 [M]<sup>+</sup>.



**Table S1.** Crystal data and structure refinement for Z-Aib-L-Dap(Boc)-Aib-NH<sub>i</sub>Pr.

|                                   |                                                               |          |
|-----------------------------------|---------------------------------------------------------------|----------|
| Identification code               | mc314                                                         |          |
| Empirical formula                 | C <sub>27</sub> H <sub>43</sub> N <sub>5</sub> O <sub>7</sub> |          |
| Formula weight                    | 549.66                                                        |          |
| Temperature                       | 293(2) K                                                      |          |
| Wavelength                        | 1.54184 Å                                                     |          |
| Crystal system                    | Orthorhombic                                                  |          |
| Space group                       | P2 <sub>1</sub> 2 <sub>1</sub> 2 <sub>1</sub>                 |          |
| Unit cell dimensions              | a = 11.85134(8) Å                                             | α = 90°. |
|                                   | b = 15.53512(13) Å                                            | β = 90°. |
|                                   | c = 17.02931(13) Å                                            | γ = 90°. |
| Volume                            | 3135.30(4) Å <sup>3</sup>                                     |          |
| Z                                 | 4                                                             |          |
| Density (calculated)              | 1.164 Mg/m <sup>3</sup>                                       |          |
| Absorption coefficient            | 0.695 mm <sup>-1</sup>                                        |          |
| F(000)                            | 1184                                                          |          |
| Crystal size                      | 0.300 x 0.200 x 0.100 mm <sup>3</sup>                         |          |
| Theta range for data collection   | 3.852 to 72.729°.                                             |          |
| Index ranges                      | -12 ≤ h ≤ 14, -19 ≤ k ≤ 19, -21 ≤ l ≤ 21                      |          |
| Reflections collected             | 31364                                                         |          |
| Independent reflections           | 6231 [R(int) = 0.0189]                                        |          |
| Completeness to theta = 67.684°   | 100.0 %                                                       |          |
| Absorption correction             | Semi-empirical from equivalents                               |          |
| Max. and min. transmission        | 1.00000 and 0.53302                                           |          |
| Refinement method                 | Full-matrix least-squares on F <sup>2</sup>                   |          |
| Data / restraints / parameters    | 6231 / 0 / 361                                                |          |
| Goodness-of-fit on F <sup>2</sup> | 1.037                                                         |          |
| Final R indices [I > 2σ(I)]       | R <sub>1</sub> = 0.0363, wR <sub>2</sub> = 0.1011             |          |
| R indices (all data)              | R <sub>1</sub> = 0.0378, wR <sub>2</sub> = 0.1032             |          |
| Absolute structure parameter      | -0.07(4)                                                      |          |
| Extinction coefficient            | n/a                                                           |          |
| Largest diff. peak and hole       | 0.162 and -0.155 e.Å <sup>-3</sup>                            |          |

**Table S2.** Selected torsion angles [°] for Z-Aib-L-Dap(Boc)-Aib-NH*i*Pr.

---

|                     |             |
|---------------------|-------------|
| C02-C01-C07-OU      | 104.1(3)    |
| C06-C01-C07-OU      | -78.3(3)    |
| C01-C07-OU-C0       | -106.7(3)   |
| C07-OU-C0-N1        | -165.05(19) |
| OU-C0-N1-C1A        | -178.84(17) |
| C0-N1-C1A-C1        | -51.5(2)    |
| N1-C1A-C1-N2        | -37.7(2)    |
| C1A-C1-N2-C2A       | -173.35(16) |
| C1-N2-C2A-C2        | -64.3(2)    |
| N2-C2A-C2B-N2G      | 62.8(2)     |
| C2A-C2B-N2G-C201    | 107.0(2)    |
| C2B-N2G-C201-O202   | 175.26(17)  |
| N2G-C201-O202-C202  | -173.1(2)   |
| C201-O202-C202-C205 | -67.9(3)    |
| C201-O202-C202-C204 | 58.2(4)     |
| C201-O202-C202-C203 | 174.5(2)    |
| N2-C2A-C2-N3        | -26.2(2)    |
| C2A-C2-N3-C3A       | -178.35(17) |
| C2-N3-C3A-C3        | -77.9(2)    |
| N3-C3A-C3-NT        | -15.9(3)    |
| C3A-C3-NT-CT1       | -172.2(2)   |
| C3-NT-CT1-CT3       | 151.8(3)    |
| C3-NT-CT1-CT2       | -81.1(3)    |

---

**Table S3.** Hydrogen bonds for Z-Aib-L-Dap(Boc)-Aib-NH*i*Pr [ $\text{\AA}$  and  $^\circ$ ].

| D-H...A        | d(D-H) | d(H...A) | d(D...A) | $\angle(\text{DHA})$ |
|----------------|--------|----------|----------|----------------------|
| N3-H3...O0     | 0.86   | 2.25     | 3.028(2) | 149.8                |
| NT-HT...O1     | 0.86   | 2.37     | 3.202(3) | 163.6                |
| N1-H1...O201#1 | 0.86   | 2.14     | 2.982(2) | 166.4                |
| N2-H2...O2#1   | 0.86   | 2.32     | 3.151(2) | 162.7                |
| N2G-H2G...O2#1 | 0.86   | 2.09     | 2.840(2) | 145.7                |

Symmetry transformations used to generate equivalent atoms:

#1  $x-1/2, -y+3/2, -z$

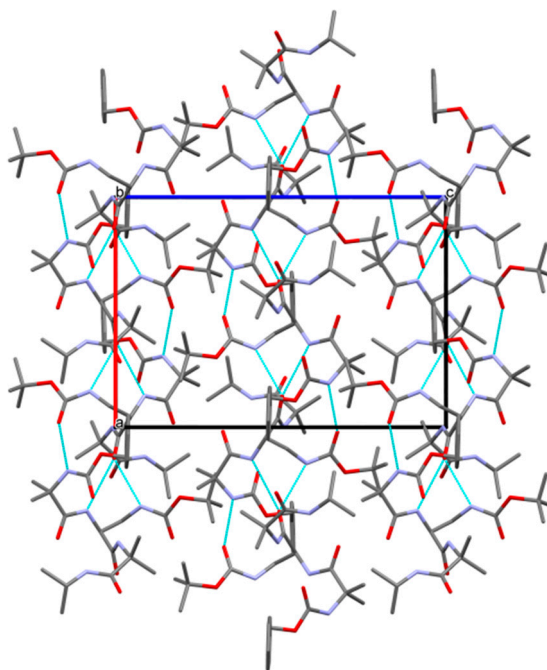

**Figure S1.** Packing mode of Z-Aib-L-Dap(Boc)-Aib-NH*i*Pr as viewed down the *b* axis. Intermolecular N-H...O=C H-bonds are indicated by dashed lines.

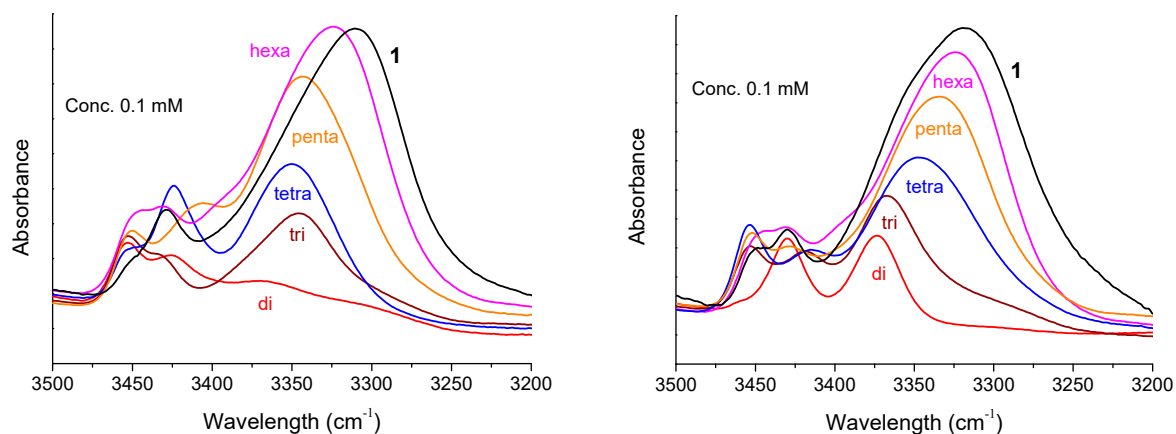

**Figure S2.** FT-IR spectra in the amide A region of the Fc-hexapeptides **1** (left) and **2** (right) and of their shorter intermediates, from the dipeptide to the hexapeptide. Peptide concentration: 0.1 mM in  $\text{CDCl}_3$ .

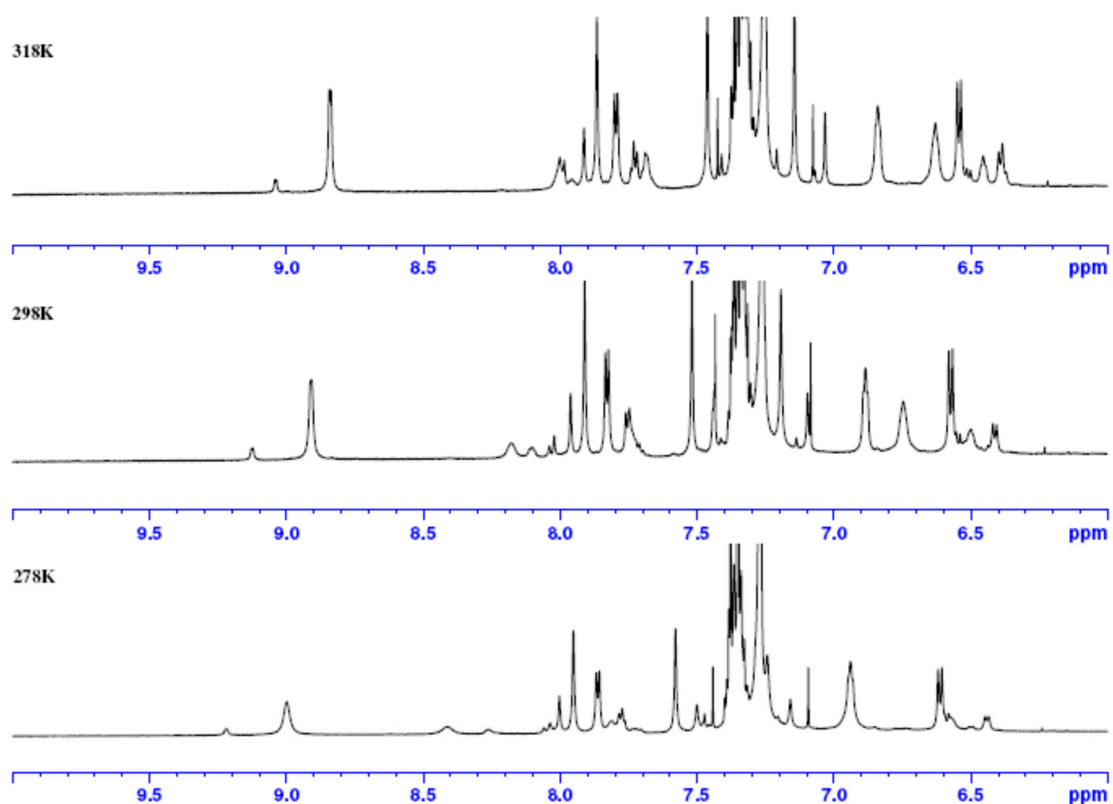

**Figure S3.**  $^1\text{H}$ -NMR spectra of the **1** in the NH region at different temperatures. Peptide concentration: 0.1 mM in  $\text{CDCl}_3$ .

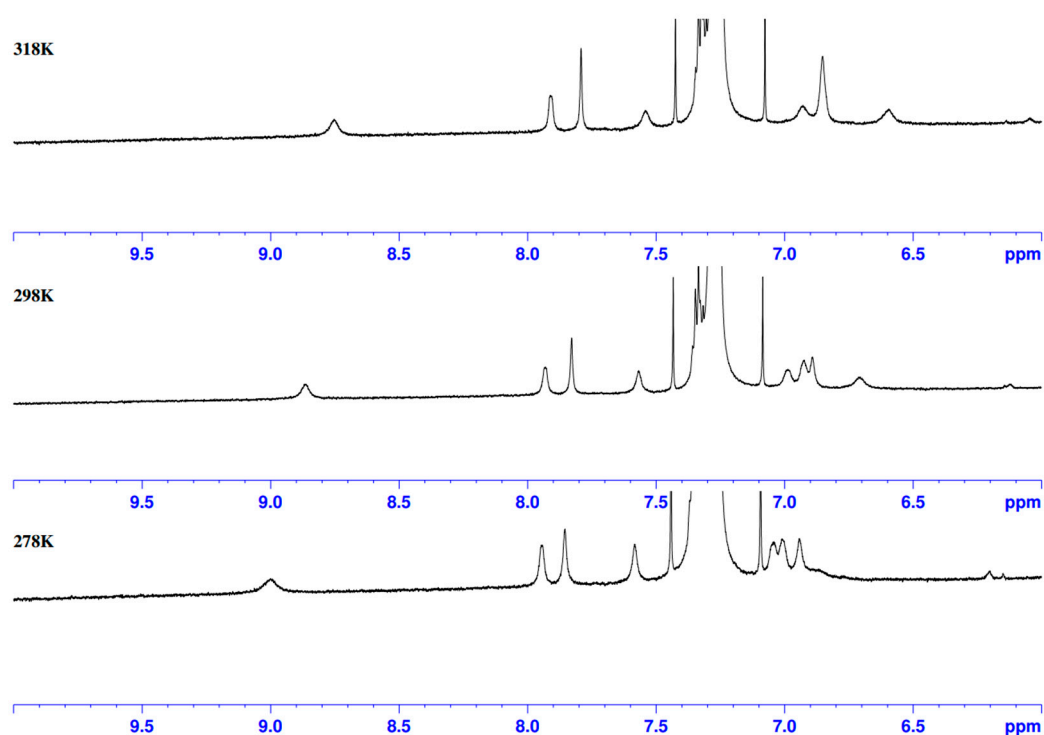

**Figure S4.**  $^1\text{H}$ -NMR spectra of the **2** in the NH region at different temperatures. Peptide concentration: 0.1 mM in  $\text{CDCl}_3$ .

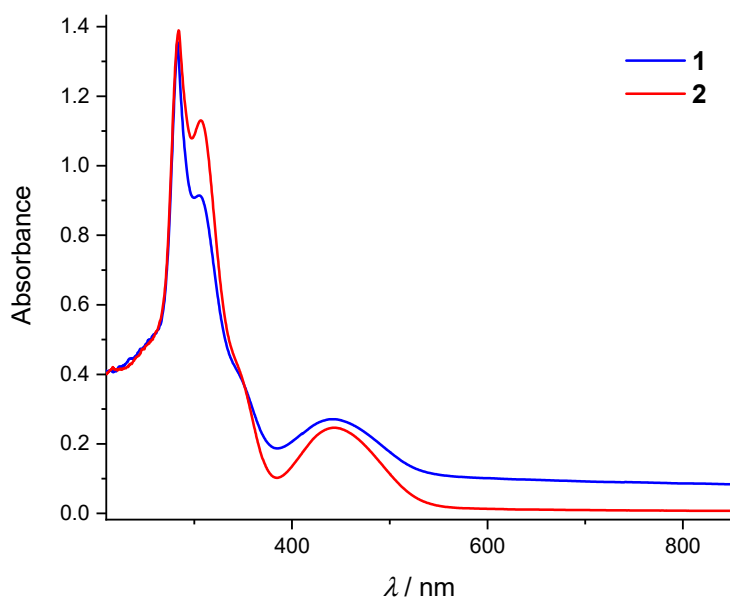

**Figure S5.** UV-vis spectra of **1** and **2** in  $\text{CH}_2\text{Cl}_2/0.1 \text{ M } n\text{Bu}_4\text{B}(\text{C}_6\text{F}_5)_4$ . Peptide concentration: 3.6 mM.

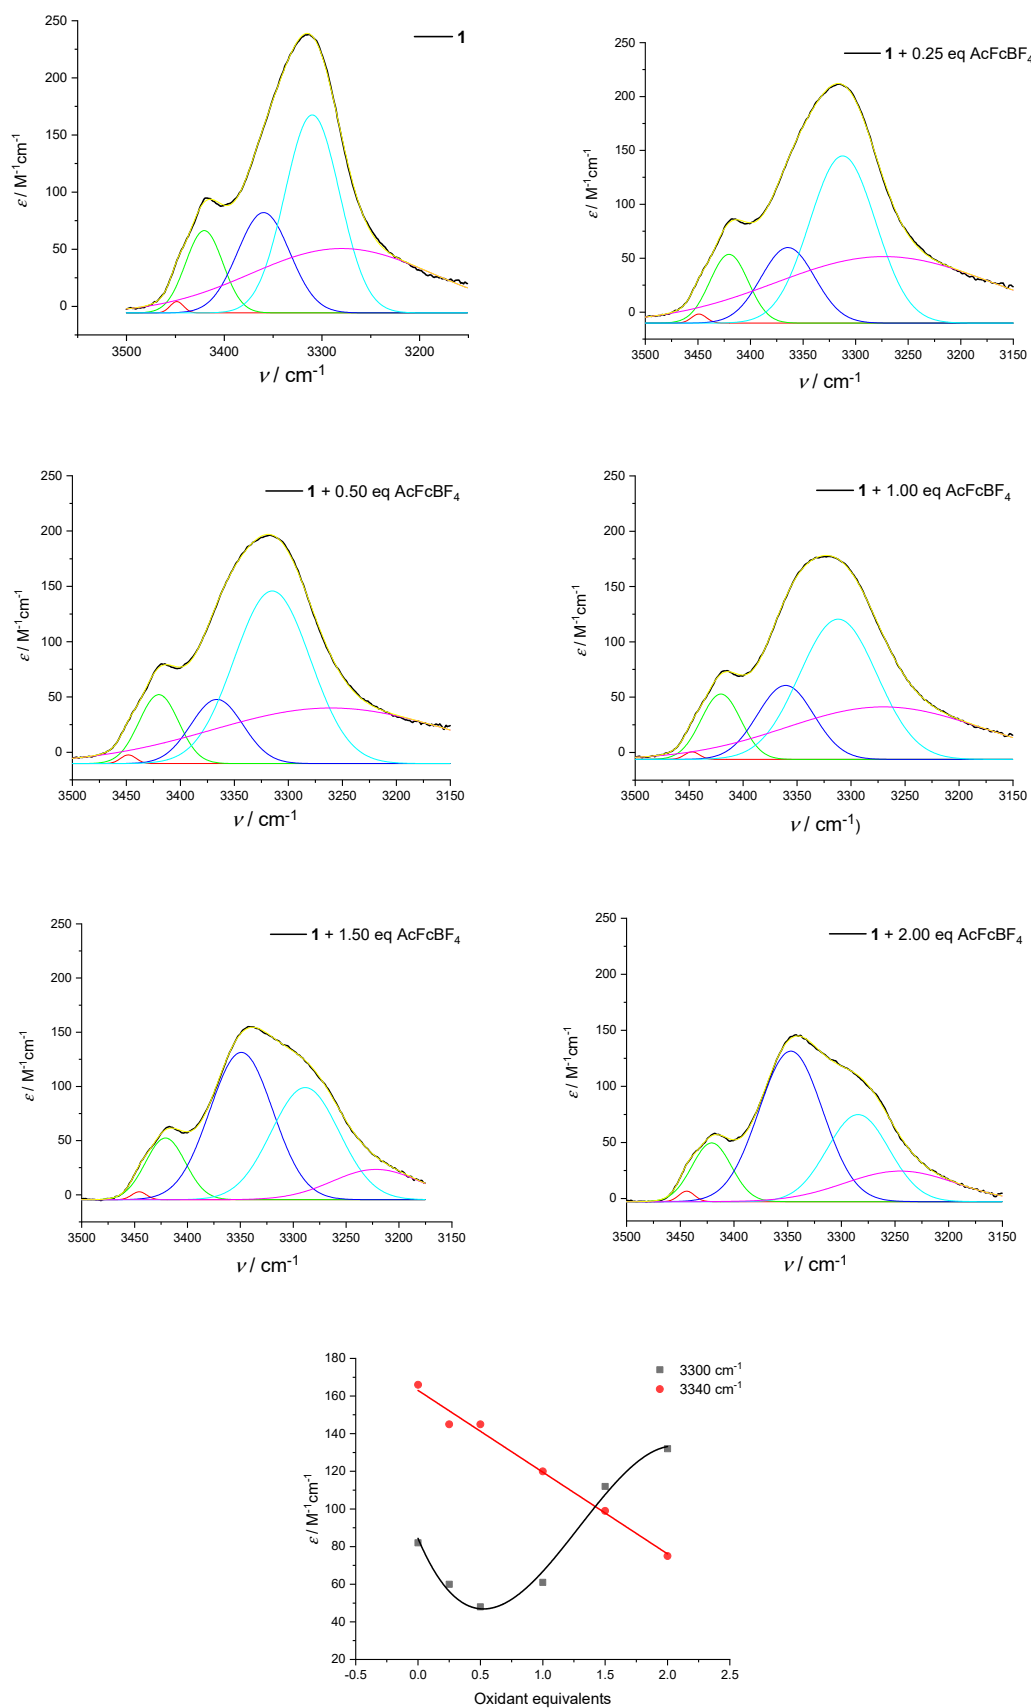

**Figure S6.** Fitting of MIR spectra of **1** in  $\text{CH}_2\text{Cl}_2/0.1 \text{ M } n\text{Bu}_4\text{B}(\text{C}_6\text{F}_5)_4$  and behavior of absorption intensities of band at around 3350 and 3300  $\text{cm}^{-1}$  as a function of oxidant addition.
